# Supplementary material for: Polybenzoxazine-based monodisperse carbon spheres with low-thermal shrinkage and their CO2 adsorption properties
Source: Royal Society of Chemistry journal article supplement (doi:10.1039/c3ta15065h), 2014-01-01
Supplement: c3ta15065h.pdf [file c3ta15065h.pdf]

## Electronic Supporting Information:

### Polybenzoxazine-based monodisperse carbon spheres with low-thermal shrinkage and their CO<sub>2</sub> adsorption property

Shuai Wang, Wen-Cui Li, Ling Zhang, Zhen-Yu Jin and An-Hui Lu\*

State Key Laboratory of Fine Chemicals, School of Chemical Engineering, Dalian University of Technology, Dalian 116024, P. R. China

\*Tel/Fax: +86 411 84986112. E-mail: anhuilu@dlut.edu.cn (A.-H. Lu).

Table S1 Cumulative volume of CBD-800 and CBDC-900 at different pore sizes.

| Sample   | pore volume /cm <sup>3</sup> ·g <sup>-1</sup> |                                |                             |                                |                               |
|----------|-----------------------------------------------|--------------------------------|-----------------------------|--------------------------------|-------------------------------|
|          | <1.5·D <sub>k</sub> <sup>a</sup><br>(~0.5nm)  | <2·D <sub>k</sub><br>(~0.68nm) | <3·D <sub>k</sub><br>(~1nm) | <4·D <sub>k</sub><br>(~1.36nm) | <5·D <sub>k</sub><br>(~1.7nm) |
| CBD-800  | 0.042                                         | 0.042                          | 0.18                        | 0.19                           | 0.19                          |
| CBDC-900 | 0.059                                         | 0.20                           | 0.31                        | 0.38                           | 0.41                          |

<sup>a</sup> D<sub>k</sub>: kinetic diameter of CO<sub>2</sub> (0.33 nm)

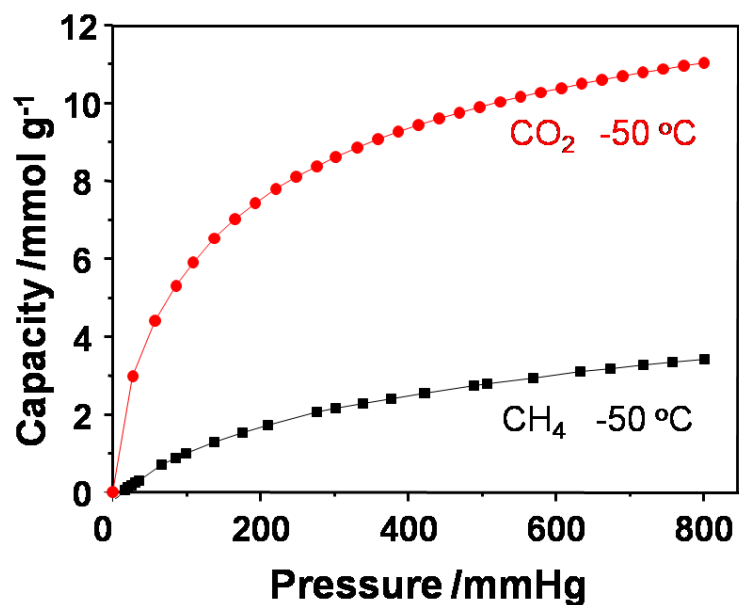

Fig. S1 CO<sub>2</sub> adsorption isotherm and CH<sub>4</sub> adsorption isotherm for CBDC-900 measured at -50 °C

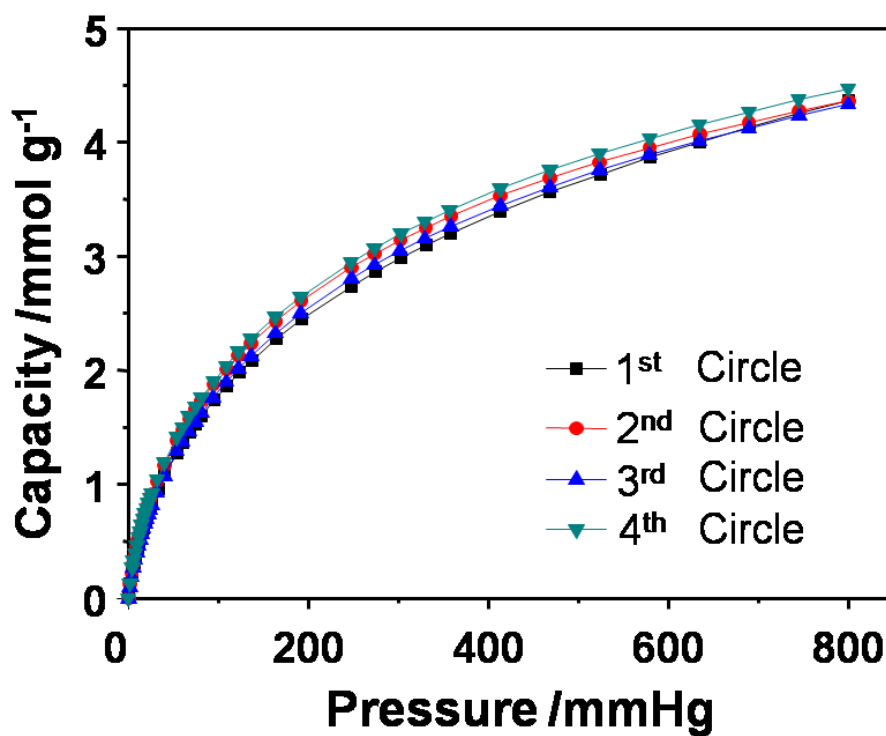

Fig. S2 CO<sub>2</sub> adsorption isotherms of CBD-800 measured at 0 °C for four repeat runs

Table S2 Comparison of the prepared carbon spheres and recently reported microporous carbon adsorbents for CO<sub>2</sub> capture at ~1 bar and 25 °C, 0 °C and -50 °C.

| Sample                | V <sub>micro</sub><br>cm <sup>3</sup> g <sup>-1</sup> | N<br>wt % | CO <sub>2</sub> adsorption capacity  |      |        |                                       |       |        |
|-----------------------|-------------------------------------------------------|-----------|--------------------------------------|------|--------|---------------------------------------|-------|--------|
|                       |                                                       |           | CO <sub>2</sub> mmol·g <sup>-1</sup> |      |        | CO <sub>2</sub> mmol·cm <sup>-3</sup> |       |        |
|                       |                                                       |           | 25 °C                                | 0 °C | -50 °C | 25 °C                                 | 0 °C  | -50 °C |
| CEM750<br>[1]         | 1.24                                                  | 4.70      | 4.38                                 | 6.92 | -      | 3.53                                  | 5.58  |        |
| CP-2-600<br>[2]       | 0.74                                                  | 10.14     | 3.90                                 | 6.20 | -      | 5.27                                  | 8.38  |        |
| PAN-PK<br>[3]         | 0.76                                                  | 8.13      | 4.40                                 | -    | -      | 5.79                                  | -     |        |
| AS-2-600<br>[4]       | 1.23                                                  | -         | 4.80                                 | 6.10 | -      | 3.90                                  | 4.96  |        |
| MFB-600<br>[5]        | 0.42                                                  | 24.40     | 2.25                                 | -    | -      | 5.36                                  | -     |        |
| CBDC-900<br>This work | 0.46                                                  | 1.66      | 3.39                                 | 5.16 | 11.03  | 7.37                                  | 11.22 | 23.98  |
| CBD-800<br>This work  | 0.27                                                  | 1.52      | 3.21                                 | 4.36 | 7.84   | 11.89                                 | 16.15 | 29.04  |

(1) Xia, Y.; Mokaya, R.; Walker, G. S.; Zhu, Y. *Adv. Energy Mater.* **2011**, 1, 678-683.

(2) Sevilla, M.; Valle-Vigón, P.; Fuertes, A. B. *Adv. Funct. Mater.* **2011**, 21, 2781-2787.

(3) Shen, W.; Zhang, S.; He, Y.; Li, J.; Fan, W. *J. Mater. Chem.* **2011**, 21, 14036-14040.

(4) Sevilla, M.; Fuertes, A. B. *Energy Environ. Sci.* **2011**, 4, 1765-1771.

(5) Pevida, C.; Drage, T. C.; Snape, C. E. *Carbon* **2008**, 46, 1464-1474.
